# Supplementary material for: Decoding intrinsic and extrinsic contributions for high piezoelectricity of CBT-based piezoelectric ceramics
Source: Royal Society of Chemistry journal article supplement (doi:10.1039/d3tc01444d), 2023-01-01
Supplement: d3tc01444d1.pdf [file d3tc01444d1.pdf]

## SUPPORTING INFORMATION

### Decode internal and external contributions for high piezoelectricity of CBT-based piezoelectric ceramics

Hao Chen, Jingwen Xi, Zhi Tan, Fei Wang, Xu Li, Ning Chen, Hongjiang Li

Ning Chen, Qiang Chen, Jie Xing\* and Jianguo Zhu\*

*College of Material Science and Engineering, Sichuan University, Chengdu 610065, China*

#### Experiment

$\text{Ca}_{0.6}(\text{Na}_{0.5}\text{Bi}_{0.5})_{0.4}\text{Bi}_4\text{Ti}_{4-x}(\text{Nb}_{2/3}\text{Mg}_{1/3})_x\text{O}_{15}$  (CBTNM-1000 $x$ ,  $x=0.00, 0.05, 0.075, 0.10, 0.125$ ) ceramics were prepared by the conventional solid-state reaction method.  $\text{CaCO}_3$  (99.0%),  $\text{Na}_2\text{CO}_3$  (99.5%),  $\text{Bi}_2\text{O}_3$  (99.999%),  $\text{TiO}_2$  (98.0%),  $\text{Nb}_2\text{O}_5$  (99.5%),  $\text{MgO}$  (99.99%) powders were used as raw materials and weighed according to the stoichiometric compositions. After being mixed by ball milling with ethanol for 18 hours, the mixture was calcined at 900 °C for 3 hours and then the calcined powders were pressed into pellets by using the 8wt% polyvinyl alcohol (PVA) binder. Finally, the samples with PVA removed were sintered in air at 1010 °C for 3 hours.

The crystal structure information was analyzed by the X-ray diffraction (XRD) with a powder X-ray diffractometer (Panalytical B. V. X'Pert Pro) and the Raman scattering spectra with an instrument (LabRAM HR, HORIBA, France). Then the surface images of grains were obtained by the scanning electron microscope (SEM, S-3400N, Hitachi), and the ferro-domain morphologies were observed by the piezoresponse force microscopy (PFM, Asylum Research, MFP-3D, USA). For investigating the electrical properties of samples, a quasi-static  $d_{33}$  meter was used to get the piezoelectric constant  $d_{33}$ , an LCR analyzer (HP4980A, Agilent, USA) was used to measure the dielectric and impedance performance, an electrometer (Keithley 6517B) was used to obtain dc resistivity, and the  $P$ - $E$  loops of samples are obtained by an analyzer (TF-2000, Aix ACCT) at 5 Hz and 200 °C.

Figure S1 shows the Rietveld refinement of the XRD patterns of the CBTNM-1000x ceramics.

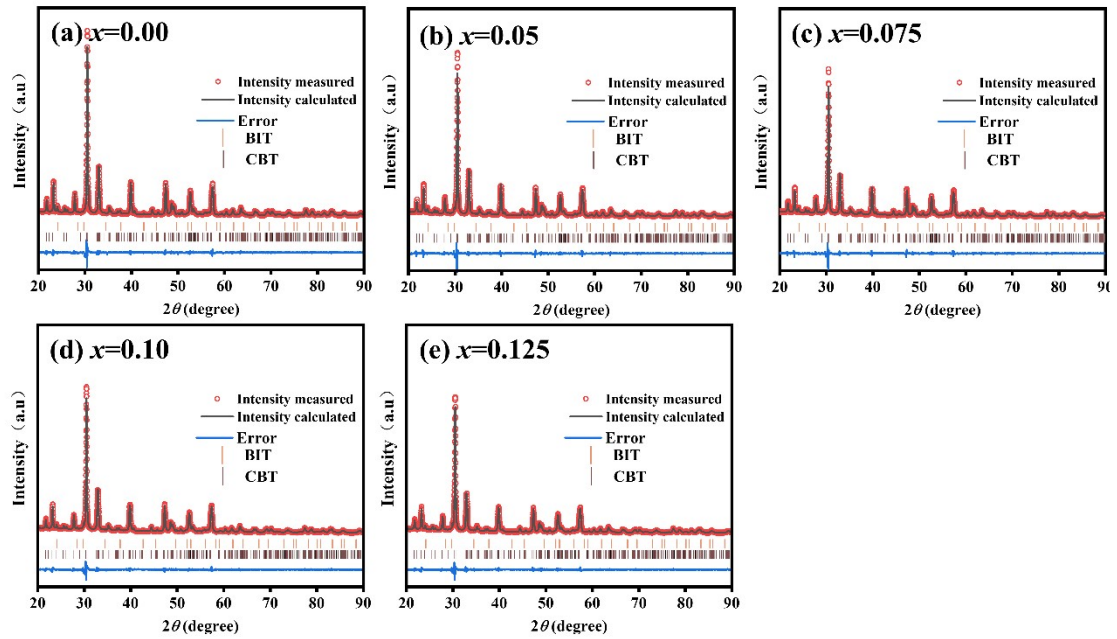

FIGURE S1 (a-e) Rietveld refinement of the XRD patterns of the CBTNM-1000x.

Figure S2 illustrates the Raman spectra of the CBTNM-1000x.

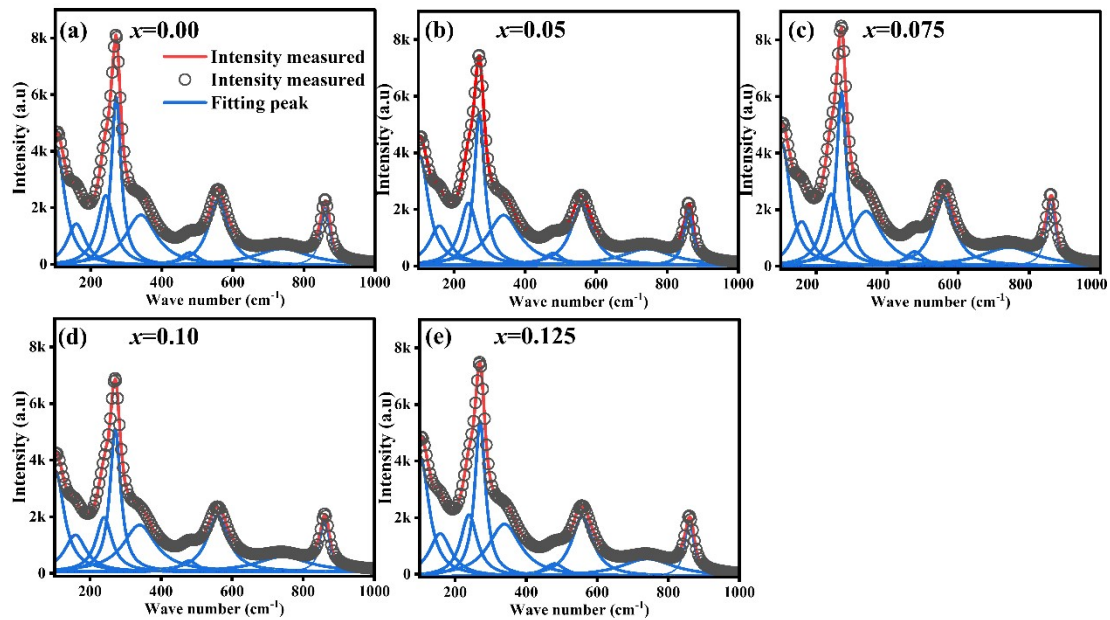

FIGURE S2 (a-e) Raman spectra of the CBTNM-1000x.

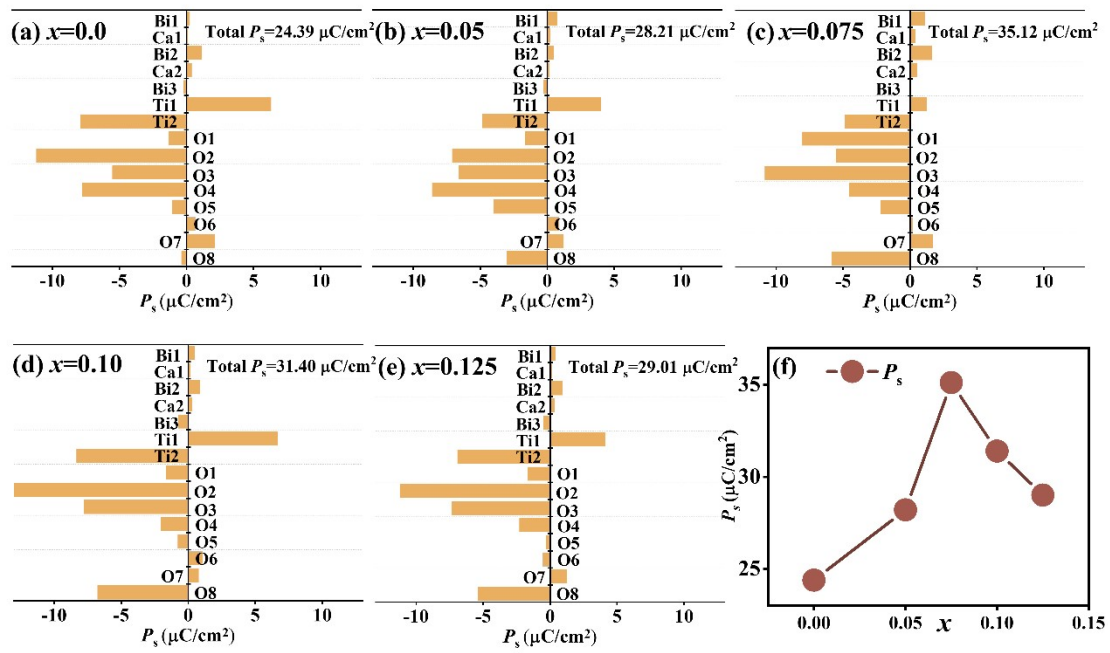

FIGURE S3 (a-e) The contribution to the  $P_s$  of each ion of CBTNM-100x ceramics.

(f) The total  $P_s$  as a function of  $x = 0.00-0.125$ .

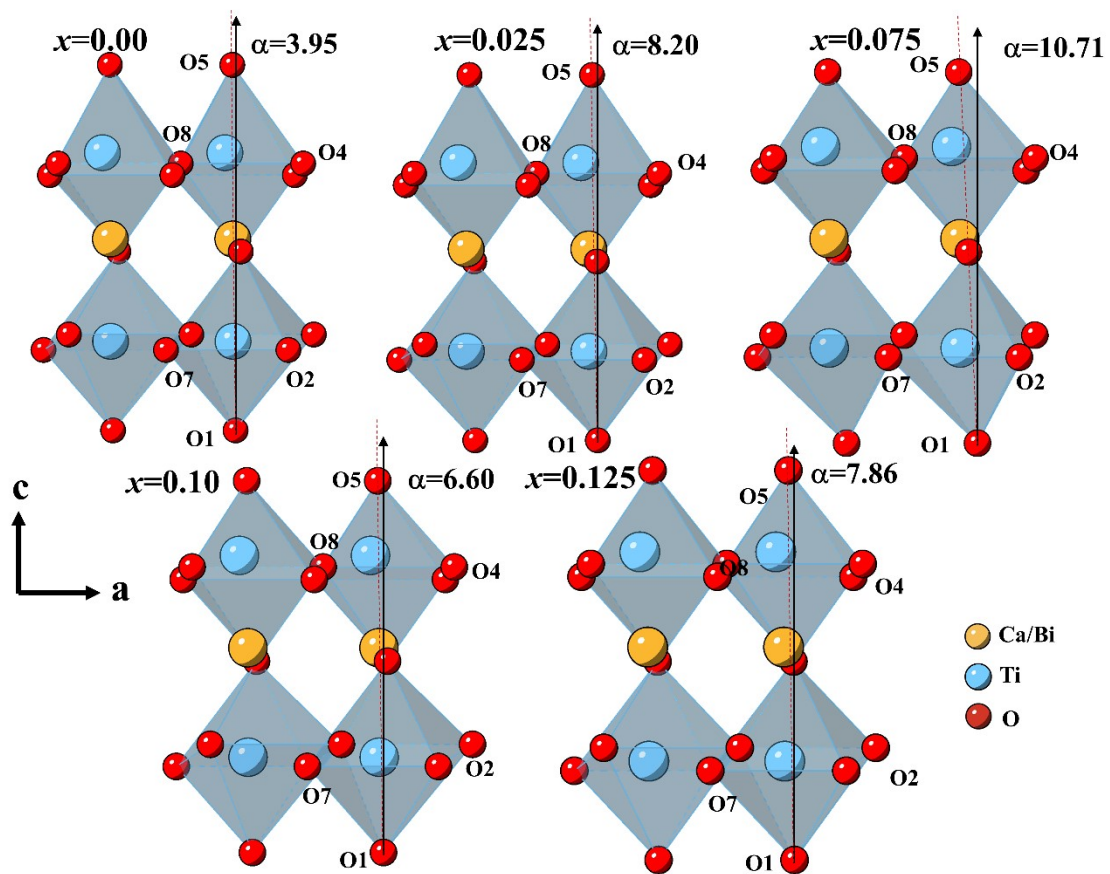

FIGURE S4. Schematic diagram of Ti-O octahedral tilt from the c-axis for the CBTNM-1000x ceramics.

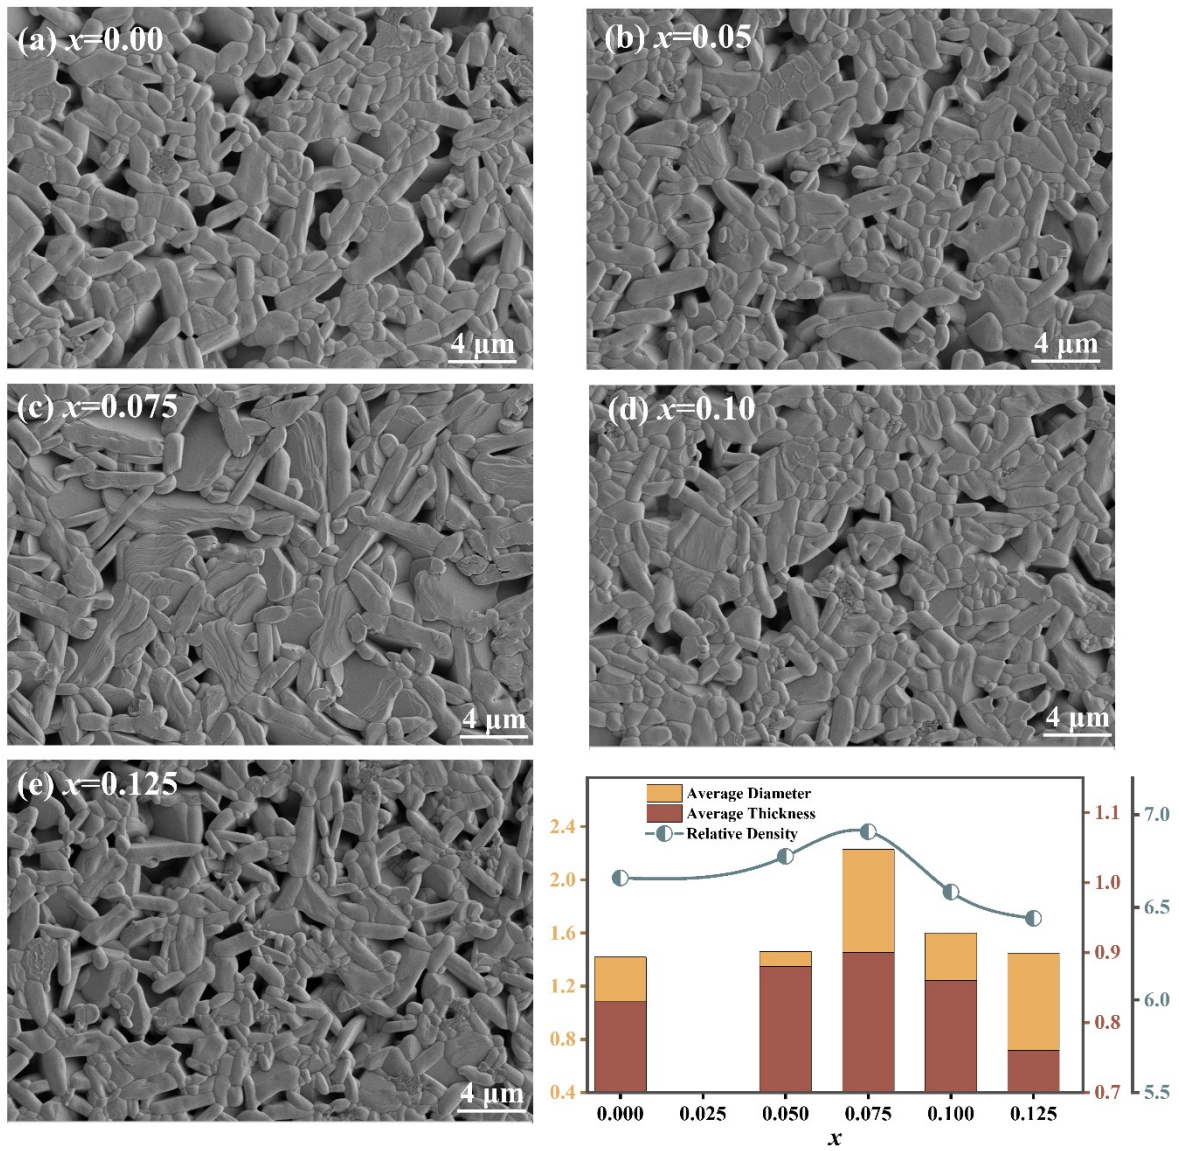

**Figure S5** (a-e) The SEM graph and (f) the average grain size of polished and thermal etched CBTNM-100x ceramics.

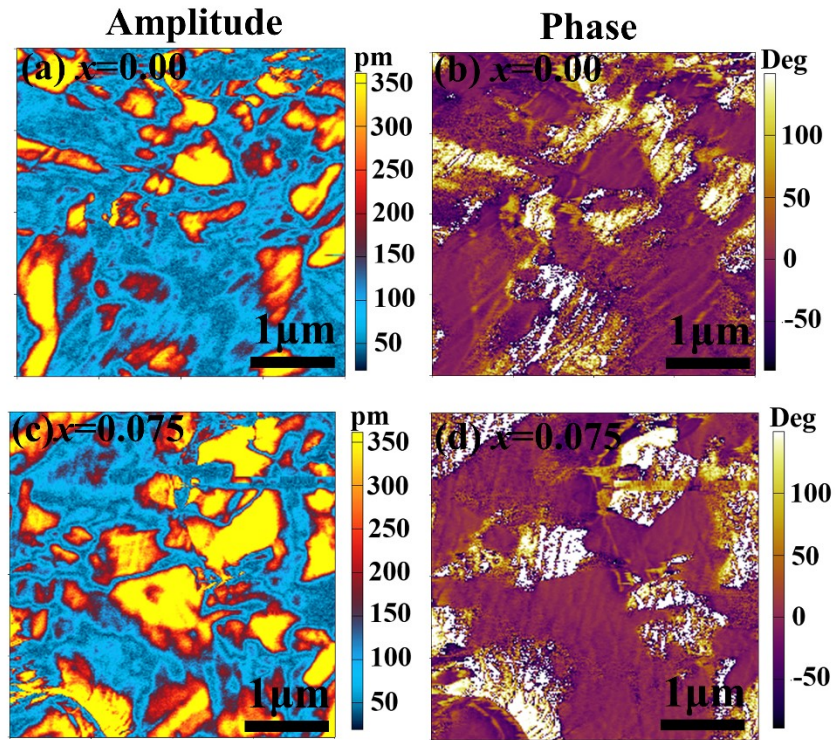

**FIGURE S6** (a-d) amplitude patterns and phase patterns of CBTNM-1000x ceramics with  $x=0.0, 0.075$  at  $4 \mu\text{m} \times 4 \mu\text{m}$  regions.

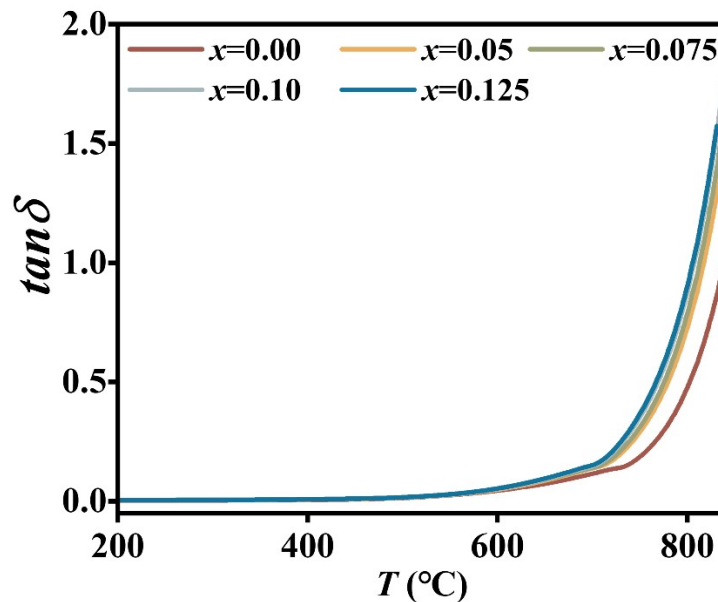

**Figure S7** Temperature dependence the dielectric loss for CBTNM-100x ceramics.

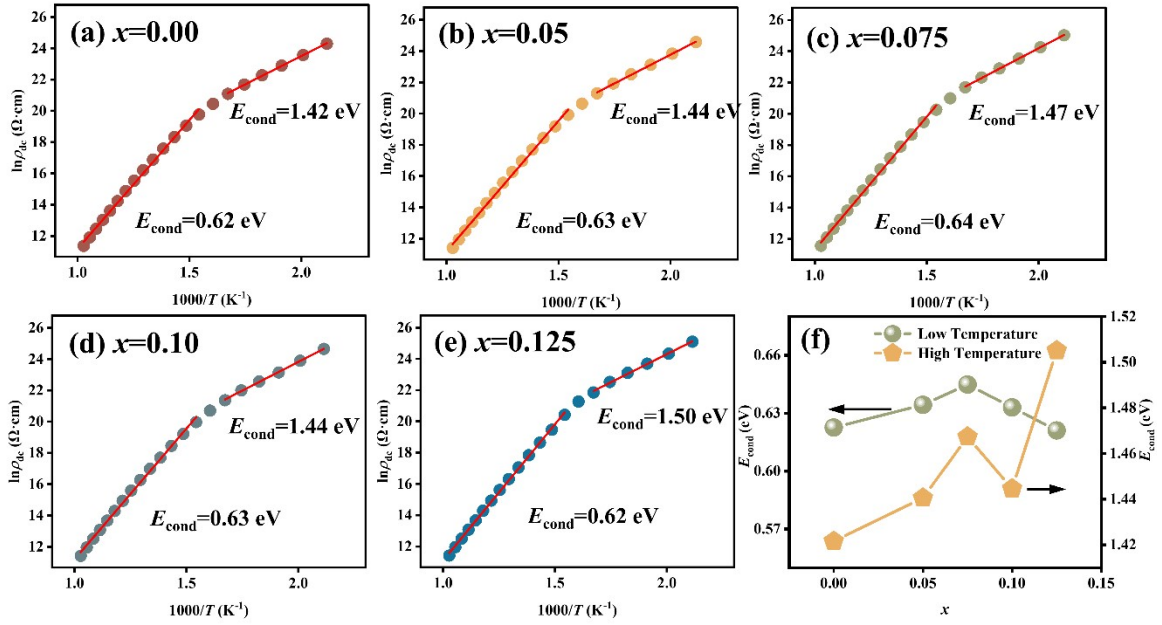

**Figure S8** (a) The relationship between temperature and  $\rho$  fitted by Arrhenius equation. (b) The activation energy ( $E_a$ ) of two temperature regions for CBTNM-1000x samples.

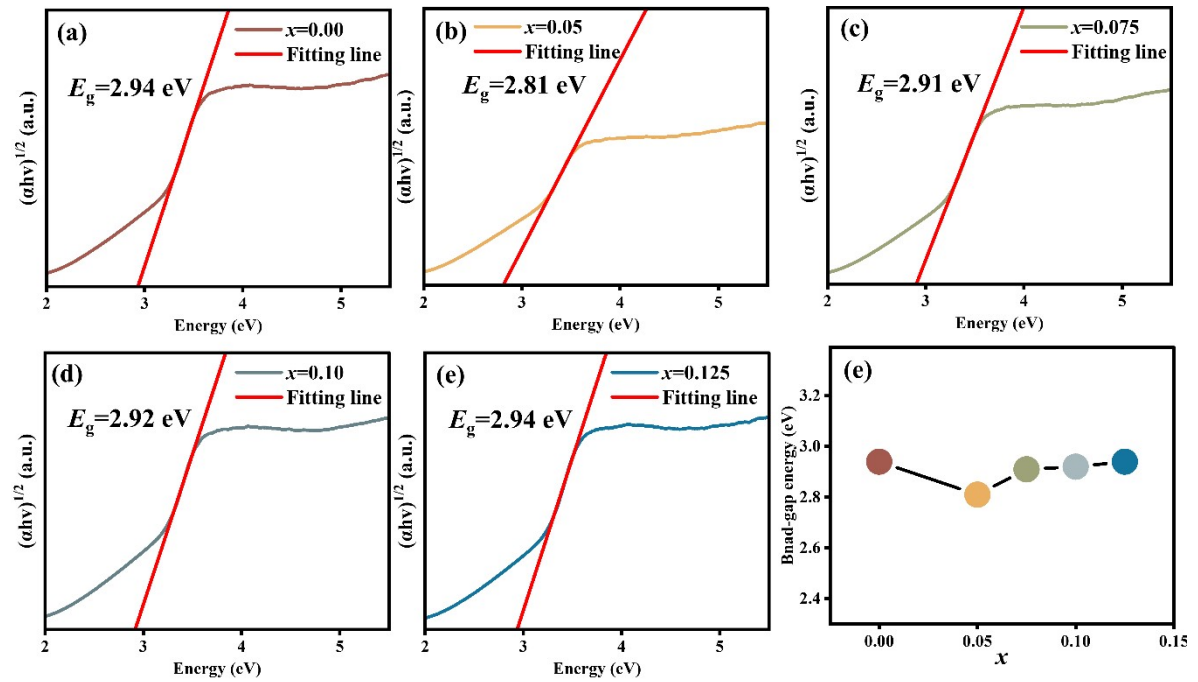

**FIGURE S9** (a) The relationship between  $(\alpha h\nu)^{1/2}$  and photon energy; (g) The band-gap energy ( $E_g$ ) of CBTNM-1000x ceramics.

**Table S1**

Crystal structure parameters of CBTNM-1000x ceramics derived from the Rietveld structure refinement program.

|                                                                                  | $x=0.00$ | $x=0.05$ | $x=0.075$ | $x=0.10$ | $x=0.125$ |
|----------------------------------------------------------------------------------|----------|----------|-----------|----------|-----------|
| $R_w$ (%)                                                                        | 5.29     | 5.35     | 5.17      | 4.98     | 4.97      |
| $Sig$                                                                            | 1.85     | 1.87     | 1.79      | 1.73     | 1.67      |
| CaBi <sub>4</sub> Ti <sub>4</sub> O <sub>15</sub> (%)<br>(volume proportion)     | 96.58    | 96.00    | 99.52     | 97.08    | 98.73     |
| Bi <sub>1.74</sub> Ti <sub>2</sub> O <sub>6.624</sub> (%)<br>(volume proportion) | 3.42     | 4.00     | 0.48      | 2.92     | 1.27      |
| $a_{CBT}$ (Å)                                                                    | 5.4350   | 5.4348   | 5.4347    | 5.4402   | 5.4411    |
| $b_{CBT}$ (Å)                                                                    | 5.4106   | 5.4115   | 5.4119    | 5.4176   | 5.4180    |
| $c_{CBT}$ (Å)                                                                    | 40.7204  | 40.7154  | 40.7198   | 40.7657  | 40.7703   |
| $a/b_{CBT}$                                                                      | 1.0045   | 1.0043   | 1.0042    | 1.0042   | 1.0043    |
| $V_{CBT}$ (Å <sup>3</sup> )                                                      | 1197.45  | 1197.49  | 1197.64   | 1201.49  | 1201.89   |

**Table S2** Atomic coordinates of CBTNM-1000x ceramics with  $x=0.0, 0.025, 0.075$ .

|     | CBTNM-0 ( $x=0.0$ ) |         |        | CBTNM-25 ( $x=0.025$ ) |        |        | CBTNM-75 ( $x=0.075$ ) |         |        |
|-----|---------------------|---------|--------|------------------------|--------|--------|------------------------|---------|--------|
|     | $x$                 | $y$     | $z$    | $x$                    | $y$    | $z$    | $x$                    | $y$     | $z$    |
| Bi1 | 0.2542              | 0.2420  | 0.0000 | 0.2623                 | 0.2314 | 0.0000 | 0.2688                 | 0.2747  | 0.0000 |
| Ca1 | 0.2542              | 0.2420  | 0.0000 | 0.2623                 | 0.2314 | 0.0000 | 0.2688                 | 0.2747  | 0.0000 |
| Bi2 | 0.2600              | 0.2419  | 0.1045 | 0.2542                 | 0.2399 | 0.1036 | 0.2641                 | 0.2780  | 0.1298 |
| Ca2 | 0.2600              | 0.2419  | 0.1045 | 0.2542                 | 0.2399 | 0.1036 | 0.2641                 | 0.2780  | 0.1298 |
| Bi3 | 0.2487              | 0.2686  | 0.2190 | 0.2486                 | 0.2689 | 0.2168 | 0.2496                 | 0.3057  | 0.2538 |
| Ti1 | 0.2771              | 0.2453  | 0.5481 | 0.2674                 | 0.2526 | 0.5441 | 0.2554                 | 0.2763  | 0.5847 |
| Ti2 | 0.2161              | 0.2538  | 0.3465 | 0.2292                 | 0.2646 | 0.3428 | 0.2290                 | 0.2909  | 0.3821 |
| O1  | 0.2724              | 0.2097  | 0.5000 | 0.2981                 | 0.2470 | 0.5000 | 0.3283                 | 0.2916  | 0.5000 |
| O2  | 0.5963              | 0.5215  | 0.0400 | 0.5610                 | 0.5549 | 0.0387 | 0.5474                 | 0.5666  | 0.0551 |
| O3  | 0.2975              | 0.3174  | 0.4050 | 0.3067                 | 0.3131 | 0.4020 | 0.3432                 | 0.3400  | 0.4392 |
| O4  | 0.5668              | 0.4720  | 0.1378 | 0.5737                 | 0.4294 | 0.1374 | 0.5392                 | 0.4878  | 0.1680 |
| O5  | 0.2592              | 0.1862  | 0.3091 | 0.2744                 | 0.1880 | 0.3044 | 0.2990                 | 0.2431  | 0.3451 |
| O6  | 0.4944              | 0.5173  | 0.2536 | 0.4923                 | 0.5301 | 0.2513 | 0.4984                 | 0.5452  | 0.2899 |
| O7  | -0.0180             | -0.0006 | 0.0434 | 0.0106                 | 0.0170 | 0.0423 | -0.0148                | -0.0258 | 0.0545 |
| O8  | 0.0032              | 0.0477  | 0.1410 | 0.0259                 | 0.0432 | 0.1391 | 0.0502                 | 0.0397  | 0.1727 |



**Table S3** Atomic coordinates of CBTNM-1000x ceramics with  $x=0.100, 0.125$ .

|     | CBTNM-100 ( $x=0.100$ ) |        |        | CBTNM-125 ( $x=0.125$ ) |         |        |
|-----|-------------------------|--------|--------|-------------------------|---------|--------|
|     | $x$                     | $y$    | $z$    | $x$                     | $y$     | $z$    |
| Bi1 | 0.2585                  | 0.2446 | 0.0000 | 0.2571                  | 0.2431  | 0.0000 |
| Ca1 | 0.2585                  | 0.2446 | 0.0000 | 0.2571                  | 0.2431  | 0.0000 |
| Bi2 | 0.2575                  | 0.2407 | 0.1046 | 0.2578                  | 0.2436  | 0.1045 |
| Ca2 | 0.2575                  | 0.2407 | 0.1046 | 0.2578                  | 0.2436  | 0.1045 |
| Bi3 | 0.2458                  | 0.2648 | 0.2192 | 0.2472                  | 0.2680  | 0.2189 |
| Ti1 | 0.2787                  | 0.2501 | 0.5478 | 0.2677                  | 0.2375  | 0.5481 |
| Ti2 | 0.2141                  | 0.2563 | 0.3471 | 0.2202                  | 0.2529  | 0.3472 |
| O1  | 0.2786                  | 0.1904 | 0.5000 | 0.2980                  | 0.1904  | 0.5000 |
| O2  | 0.6180                  | 0.5121 | 0.0406 | 0.5967                  | 0.5195  | 0.0412 |
| O3  | 0.3170                  | 0.3285 | 0.4045 | 0.3131                  | 0.3267  | 0.4042 |
| O4  | 0.5176                  | 0.4970 | 0.1425 | 0.5197                  | 0.4940  | 0.1393 |
| O5  | 0.2567                  | 0.2115 | 0.3108 | 0.2756                  | 0.1838  | 0.3088 |
| O6  | 0.4907                  | 0.5363 | 0.2425 | 0.5047                  | 0.5249  | 0.2521 |
| O7  | -0.0067                 | 0.0120 | 0.0444 | -0.0108                 | -0.0124 | 0.0424 |
| O8  | 0.0583                  | 0.0267 | 0.1396 | 0.0464                  | -0.0038 | 0.1401 |

**Table S4**  $\tan\delta$  for CBTNM-100x ceramics with different temperature.

| $x$   | $\tan\delta$<br>(RT) | $\tan\delta$<br>(250°C) | $\tan\delta$<br>(350°C) | $\tan\delta$<br>(450°C) | $\tan\delta$<br>(550°C) | $\tan\delta$<br>(650°C) |
|-------|----------------------|-------------------------|-------------------------|-------------------------|-------------------------|-------------------------|
| 0.0   | 0.0033               | 0.0037                  | 0.0047                  | 0.0082                  | 0.0252                  | 0.0733                  |
| 0.05  | 0.0040               | 0.0047                  | 0.0062                  | 0.0101                  | 0.0266                  | 0.0864                  |
| 0.075 | 0.0041               | 0.0049                  | 0.0064                  | 0.0107                  | 0.0291                  | 0.0907                  |
| 0.10  | 0.0039               | 0.0049                  | 0.0065                  | 0.0107                  | 0.0278                  | 0.0918                  |
| 0.125 | 0.0044               | 0.0053                  | 0.0067                  | 0.0107                  | 0.0290                  | 0.0957                  |
